# Supplementary material for: Infection intensity-dependent accuracy of reagent strip for the diagnosis of Schistosoma haematobium and estimation of treatment prevalence thresholds
Source: PubMed Central journal article supplement (PMC9071146; doi:10.1371/journal.pntd.0010332), 2022-04-25
Supplement: pntd.0010332.s001.pdf [file pntd.0010332.s001.pdf]

# S1 Table

Observed prevalence and mean infection intensity by urine filtration and prevalence by microhematuria using reagent strip on one and five cumulative days, stratified by village (Tanzania survey, 1993 [1]).

| Village  | Survey    | Urine filtration |              |        |              |       |         | Reagent strip |                              |                              |        |                              |                              |
|----------|-----------|------------------|--------------|--------|--------------|-------|---------|---------------|------------------------------|------------------------------|--------|------------------------------|------------------------------|
|          |           | Day 1            |              | 5 days |              |       |         | Day 1         |                              |                              | 5 days |                              |                              |
|          |           | N                | Positive (%) | N      | Positive (%) | $\mu$ | $\mu^+$ | N             | Positive T+ <sup>1</sup> (%) | Positive T- <sup>2</sup> (%) | N      | Positive T+ <sup>1</sup> (%) | Positive T- <sup>2</sup> (%) |
| <b>A</b> | Baseline  | 310              | 56.5         | 357    | 70.0         | 52.4  | 74.8    | 311           | 58.8                         | 52.7                         | 357    | 77.6                         | 63.6                         |
|          | 2 months  | 288              | 15.3         | 328    | 22.3         | 0.8   | 3.5     | 287           | 24.0                         | 19.5                         | 328    | 38.4                         | 27.7                         |
|          | 4 months  | 205              | 12.2         | 249    | 20.9         | 1.4   | 6.9     | 206           | 22.8                         | 19.9                         | 248    | 39.5                         | 31.5                         |
|          | 6 months  | 241              | 40.7         | 244    | 59.0         | 5.5   | 9.4     | 172           | 32.0                         | 23.3                         | 244    | 50.4                         | 39.3                         |
|          | 12 months | 219              | 37.9         | 288    | 59.4         | 13.7  | 23.0    | 220           | 48.2                         | 33.2                         | 288    | 60.8                         | 48.6                         |
|          | 18 months | 202              | 56.9         | 237    | 69.2         | 22.9  | 33.1    | 141           | 100                          | 77.3                         | 187    | 100                          | 89.3                         |
|          | 24 months | 175              | 41.7         | 210    | 59.0         | 11.7  | 19.7    | 76            | 100                          | 84.2                         | 139    | 100                          | 88.5                         |
| <b>B</b> | Baseline  | 178              | 82.6         | 207    | 91.8         | 107.0 | 116.6   | 179           | 86.6                         | 58.7                         | 207    | 93.2                         | 81.6                         |
|          | 2 months  | 163              | 15.3         | 197    | 32.5         | 1.1   | 3.5     | 163           | 42.3                         | 23.3                         | 196    | 54.6                         | 40.3                         |
|          | 4 months  | 129              | 10.9         | 171    | 24.6         | 0.4   | 1.8     | 129           | 17.1                         | 9.3                          | 171    | 33.9                         | 22.8                         |
|          | 6 months  | 173              | 23.7         | 177    | 42.9         | 2.5   | 5.9     | 150           | 23.3                         | 15.3                         | 176    | 51.1                         | 26.1                         |
|          | 12 months | 67               | 23.9         | 76     | 44.7         | 4.8   | 10.8    | 0             | -                            | -                            | 32     | 96.9                         | 65.6                         |
|          | 18 months | 144              | 59.7         | 163    | 72.4         | 66.7  | 92.1    | 89            | 100                          | 83.1                         | 117    | 100                          | 88.9                         |
|          | 24 months | 113              | 44.2         | 151    | 50.3         | 36.8  | 73.0    | 68            | 98.5                         | 70.6                         | 85     | 98.8                         | 81.2                         |

N is the number of individuals tested;  $\mu$  is the mean number of eggs per 10 ml of urine in the population after 5 tests on consecutive days;  $\mu^+$  is the mean number of eggs per 10 ml of urine in the positive individuals after 5 tests on consecutive days.

<sup>1</sup> Trace results are regarded as positive.

<sup>2</sup> Trace results are regarded as negative.

## References

1. Hatz C, Vennervald BJ, Nkulila T, Vounatsou P, Kombe Y, Mayombana C, et al. Evolution of *Schistosoma haematobium*-related pathology over 24 months after treatment with praziquantel among school children in southeastern Tanzania. Am J Trop Med Hyg. 1998;59:775–781.
