# Supplementary material for: Infection intensity-dependent accuracy of reagent strip for the diagnosis of Schistosoma haematobium and estimation of treatment prevalence thresholds
Source: PubMed Central journal article supplement (PMC9071146; doi:10.1371/journal.pntd.0010332), 2022-04-25
Supplement: pntd.0010332.s002.pdf [file pntd.0010332.s002.pdf]

## Supplementary Text S1

Parameters describing the sensitivity and specificity of a reagent strip test for microhaematuria including trace results (T) from one to 5 days of urine testing in a study pertaining to *S. haematobium* morbidity before and up to 2 years after praziquantel treatment.

| Number of tests  | 1                   | 2                   | 3                   | 4                   | 5                   |
|------------------|---------------------|---------------------|---------------------|---------------------|---------------------|
| Reagent strip    |                     |                     |                     |                     |                     |
| $c$              | 0.97 (0.92-1.00)    | 0.93 (0.86-0.99)    | 0.92 (0.85-0.99)    | 0.89 (0.82-0.98)    | 0.87 (0.80-0.96)    |
| $a_0$            | -0.43 (-0.77--0.10) | 0.09 (-0.24-0.37)   | 0.46 (0.14-0.73)    | 0.67 (0.38-0.96)    | 0.78 (0.49-1.04)    |
| $a_1$            | 0.12 (0.04-0.27)    | 0.10 (0.03-0.23)    | 0.10 (0.03-0.24)    | 0.09 (0.03-0.22)    | 0.09 (0.03-0.21)    |
| $a_2$            | 3.60 (1.90-8.29)    | 3.88 (1.99-9.50)    | 3.89 (1.94-9.74)    | 4.02 (2.04-9.27)    | 4.40 (2.18-10.69)   |
| $a_3$            | 0.98 (0.97-0.99)    | 0.99 (0.99-1.00)    | 0.99 (0.99-1.00)    | 1.00 (0.99-1.00)    | 1.00 (0.99-1.00)    |
| Urine filtration |                     |                     |                     |                     |                     |
| $k_0$            | -2.34 (-2.47--2.22) | -2.37 (-2.50--2.25) | -2.36 (-2.49--2.24) | -2.36 (-2.48--2.24) | -2.36 (-2.48--2.24) |
| $k_1$            | 0.38 (0.35-0.42)    | 0.39 (0.36-0.42)    | 0.39 (0.36-0.42)    | 0.39 (0.36-0.42)    | 0.39 (0.35-0.42)    |

Parameters describing the sensitivity and specificity of a reagent strip for microhaematuria excluding trace results (1) from one to 5 days of urine testing in a study pertaining to *S. haematobium* morbidity before and up to 2 years after praziquantel treatment.

| Number of tests  | 1                   | 2                   | 3                   | 4                   | 5                   |
|------------------|---------------------|---------------------|---------------------|---------------------|---------------------|
| Reagent strip    |                     |                     |                     |                     |                     |
| $c$              | 0.99 (0.96-1.00)    | 0.99 (0.97-1.00)    | 0.99 (0.96-1.00)    | 0.98 (0.94-1.00)    | 0.97 (0.92-1.00)    |
| $a_0$            | -0.93 (-1.31--0.60) | -0.59 (-0.89--0.31) | -0.29 (-0.59--0.04) | -0.16 (-0.47-0.10)  | -0.12 (-0.43-0.14)  |
| $a_1$            | 0.22 (0.08-0.47)    | 0.21 (0.09-0.42)    | 0.18 (0.07-0.37)    | 0.17 (0.06-0.36)    | 0.17 (0.06-0.36)    |
| $a_2$            | 1.28 (0.73-2.83)    | 1.15 (0.74-2.14)    | 1.38 (0.86-2.69)    | 1.61 (0.91-3.56)    | 1.75 (0.97-3.94)    |
| $a_3$            | 0.89 (0.84-0.95)    | 0.97 (0.93-1.00)    | 0.98 (0.95-1.00)    | 0.98 (0.95-1.00)    | 0.98 (0.96-1.00)    |
| Urine filtration |                     |                     |                     |                     |                     |
| $k_0$            | -2.31 (-2.43--2.19) | -2.30 (-2.43--2.19) | -2.30 (-2.43--2.18) | -2.31 (-2.42--2.19) | -2.31 (-2.43--2.19) |
| $k_1$            | 0.38 (0.34-0.41)    | 0.37 (0.34-0.41)    | 0.37 (0.34-0.41)    | 0.37 (0.34-0.41)    | 0.37 (0.34-0.41)    |

Parameters describing the sensitivity and specificity of a reagent strip for microhaematuria excluding trace and 1+ results (2) from one to 5 days of urine testing in a study pertaining to *S. haematobium* morbidity before and up to 2 years after praziquantel treatment.

| Number of tests  | 1                   | 2                   | 3                   | 4                   | 5                   |
|------------------|---------------------|---------------------|---------------------|---------------------|---------------------|
| Reagent strip    |                     |                     |                     |                     |                     |
| $c$              | 1.00 (0.98-1.00)    | 0.99 (0.98-1.00)    | 0.99 (0.97-1.00)    | 0.99 (0.97-1.00)    | 0.99 (0.96-1.00)    |
| $a_0$            | -1.53 (-1.90--1.21) | -1.42 (-1.77--1.13) | -1.18 (-1.52--0.89) | -1.05 (-1.37--0.77) | -0.98 (-1.28--0.70) |
| $a_1$            | 0.28 (0.13-0.51)    | 0.25 (0.11-0.46)    | 0.22 (0.09-0.43)    | 0.21 (0.09-0.41)    | 0.20 (0.08-0.38)    |
| $a_2$            | 0.87 (0.58-1.42)    | 1.02 (0.70-1.62)    | 1.14 (0.79-1.84)    | 1.25 (0.85-2.02)    | 1.40 (0.94-2.30)    |
| $a_3$            | 0.93 (0.86-0.99)    | 0.98 (0.94-1.00)    | 0.99 (0.96-1.00)    | 0.99 (0.96-1.00)    | 0.99 (0.97-1.00)    |
| Urine filtration |                     |                     |                     |                     |                     |
| $k_0$            | -2.31 (-2.43--2.18) | -2.31 (-2.43--2.19) | -2.30 (-2.42--2.18) | -2.30 (-2.41--2.17) | -2.30 (-2.42--2.18) |
| $k_1$            | 0.37 (0.34-0.41)    | 0.37 (0.34-0.41)    | 0.37 (0.34-0.40)    | 0.37 (0.34-0.40)    | 0.37 (0.34-0.40)    |
